# Supplementary material for: Sub-millimeter fiberscopic robot with integrated maneuvering, imaging, and biomedical operation abilities
Source: PubMed Central journal article supplement — Nat Commun. 2024 Dec 30;15:10874. doi: 10.1038/s41467-024-55199-6 (PMC11685957; doi:10.1038/s41467-024-55199-6), 2024-12-30
Supplement: 41467_2024_55199_MOESM8_ESM.pdf [file 41467_2024_55199_MOESM8_ESM.pdf]

## Reporting Summary

Nature Portfolio wishes to improve the reproducibility of the work that we publish. This form provides structure for consistency and transparency in reporting. For further information on Nature Portfolio policies, see our [Editorial Policies](#) and the [Editorial Policy Checklist](#).

### Statistics

For all statistical analyses, confirm that the following items are present in the figure legend, table legend, main text, or Methods section.

n/a Confirmed

- The exact sample size ( $n$ ) for each experimental group/condition, given as a discrete number and unit of measurement
- A statement on whether measurements were taken from distinct samples or whether the same sample was measured repeatedly
- The statistical test(s) used AND whether they are one- or two-sided  
*Only common tests should be described solely by name; describe more complex techniques in the Methods section.*
- A description of all covariates tested
- A description of any assumptions or corrections, such as tests of normality and adjustment for multiple comparisons
- A full description of the statistical parameters including central tendency (e.g. means) or other basic estimates (e.g. regression coefficient) AND variation (e.g. standard deviation) or associated estimates of uncertainty (e.g. confidence intervals)
- For null hypothesis testing, the test statistic (e.g.  $F$ ,  $t$ ,  $r$ ) with confidence intervals, effect sizes, degrees of freedom and  $P$  value noted  
*Give  $P$  values as exact values whenever suitable.*
- For Bayesian analysis, information on the choice of priors and Markov chain Monte Carlo settings
- For hierarchical and complex designs, identification of the appropriate level for tests and full reporting of outcomes
- Estimates of effect sizes (e.g. Cohen's  $d$ , Pearson's  $r$ ), indicating how they were calculated

*Our web collection on [statistics for biologists](#) contains articles on many of the points above.*

### Software and code

Policy information about [availability of computer code](#)

Data collection

Solidworks 2016 is employed to show the schematic illustration and the modeling of the fiberoptic robot and the corresponding imaging/advancing system. To capture the images and videos shown in this study, MindVision Camera Platform Setup (2.1.10.142), DinoCapture 2.0, and Xiaomi 8 UD are utilized. The software Arduino 1.8.5 is used for controlling of the rear-end advancing platform and collecting the position data of all the motors.

Data analysis

All the data extracted from the images and videos are with the help of MATLAB R2021b. Origin 2021 and Microsoft Visio 2016 are correspondingly employed to plot the data and present the entire figures. ImageViewer X64 V2.0.4.0422 is employed to read and analyze H&E images.

For manuscripts utilizing custom algorithms or software that are central to the research but not yet described in published literature, software must be made available to editors and reviewers. We strongly encourage code deposition in a community repository (e.g. GitHub). See the Nature Portfolio [guidelines for submitting code & software](#) for further information.

## Data

Policy information about [availability of data](#)

All manuscripts must include a [data availability statement](#). This statement should provide the following information, where applicable:

- Accession codes, unique identifiers, or web links for publicly available datasets
- A description of any restrictions on data availability
- For clinical datasets or third party data, please ensure that the statement adheres to our [policy](#)

All the data supporting the findings of this study are available within this article and its Supplementary Information. Any additional information can be obtained from corresponding authors upon request. Source data are provided with this paper.

## Research involving human participants, their data, or biological material

Policy information about studies with [human participants or human data](#). See also policy information about [sex, gender \(identity/presentation\), and sexual orientation](#) and [race, ethnicity and racism](#).

|                                                                    |                                                                                                                 |
|--------------------------------------------------------------------|-----------------------------------------------------------------------------------------------------------------|
| Reporting on sex and gender                                        | <input type="text" value="This study does not involve sex, gender, and sexual orientation."/>                   |
| Reporting on race, ethnicity, or other socially relevant groupings | <input type="text" value="This study does not involve race, ethnicity, or other socially relevant groupings."/> |
| Population characteristics                                         | <input type="text" value="This study does not involve human data."/>                                            |
| Recruitment                                                        | <input type="text" value="This study does not involve human recruitment."/>                                     |
| Ethics oversight                                                   | <input type="text" value="This study does not involve human data."/>                                            |

Note that full information on the approval of the study protocol must also be provided in the manuscript.

## Field-specific reporting

Please select the one below that is the best fit for your research. If you are not sure, read the appropriate sections before making your selection.

Life sciences       Behavioural & social sciences       Ecological, evolutionary & environmental sciences

For a reference copy of the document with all sections, see [nature.com/documents/nr-reporting-summary-flat.pdf](https://www.nature.com/documents/nr-reporting-summary-flat.pdf)

## Life sciences study design

All studies must disclose on these points even when the disclosure is negative.

|                 |                                                                                                                                               |
|-----------------|-----------------------------------------------------------------------------------------------------------------------------------------------|
| Sample size     | <input type="text" value="There are three porcine lung models are utilized as the samples for demonstrating the interventional procedures."/> |
| Data exclusions | <input type="text" value="No data are excluded."/>                                                                                            |
| Replication     | <input type="text" value="Similar results can be found in repeated three times experiments."/>                                                |
| Randomization   | <input type="text" value="All the samples are randomly allocated into experimental groups."/>                                                 |
| Blinding        | <input type="text" value="The investigators are blinded to group allocation during data collection and/or analysis."/>                        |

## Reporting for specific materials, systems and methods

We require information from authors about some types of materials, experimental systems and methods used in many studies. Here, indicate whether each material, system or method listed is relevant to your study. If you are not sure if a list item applies to your research, read the appropriate section before selecting a response.

## Materials & experimental systems

- n/a  Involved in the study
- Antibodies
- Eukaryotic cell lines
- Palaeontology and archaeology
- Animals and other organisms
- Clinical data
- Dual use research of concern
- Plants

## Methods

- n/a  Involved in the study
- ChIP-seq
- Flow cytometry
- MRI-based neuroimaging

## Animals and other research organisms

Policy information about [studies involving animals](#); [ARRIVE guidelines](#) recommended for reporting animal research, and [Sex and Gender in Research](#)

- Laboratory animals
- Wild animals
- Reporting on sex
- Field-collected samples
- Ethics oversight

Note that full information on the approval of the study protocol must also be provided in the manuscript.

## Plants

- Seed stocks
- Novel plant genotypes
- Authentication
